# Supplementary material for: Norepinephrine acting on adventitial fibroblasts stimulates vascular smooth muscle cell proliferation via promoting small extracellular vesicle release
Source: PubMed Central journal article supplement (PMC9254254; doi:10.7150/thno.70974), 2022-06-06
Supplement: thnov12p4718s1.pdf [file thnov12p4718s1.pdf]

# Online Data Supplement

(Figure S1-S4 & Table S1)

## **Norepinephrine acting on adventitial fibroblasts stimulates vascular smooth muscle cell proliferation via promoting extracellular vesicle release**

Chao Ye<sup>1</sup>; Fen Zheng<sup>1</sup>; Tao Xu<sup>1</sup>; Nan Wu<sup>1</sup>; Ying Tong<sup>1</sup>; Xiao-Qing Xiong<sup>1</sup>; Ye-Bo Zhou<sup>1</sup>; Jue-Jin Wang<sup>1</sup>; Qi Chen<sup>2</sup>; Yue-Hua Li<sup>2</sup>; Guo-Qing Zhu<sup>1\*</sup>; Ying Han<sup>1\*</sup>

<sup>1</sup> Key Laboratory of Targeted Intervention of Cardiovascular Disease, Collaborative Innovation Center for Cardiovascular Disease Translational Medicine, and Department of Physiology, Nanjing Medical University, Nanjing, Jiangsu 211166, China;

<sup>2</sup> Department of Pathophysiology, Nanjing Medical University, Nanjing, Jiangsu 211166, China

# Supplemental Figures

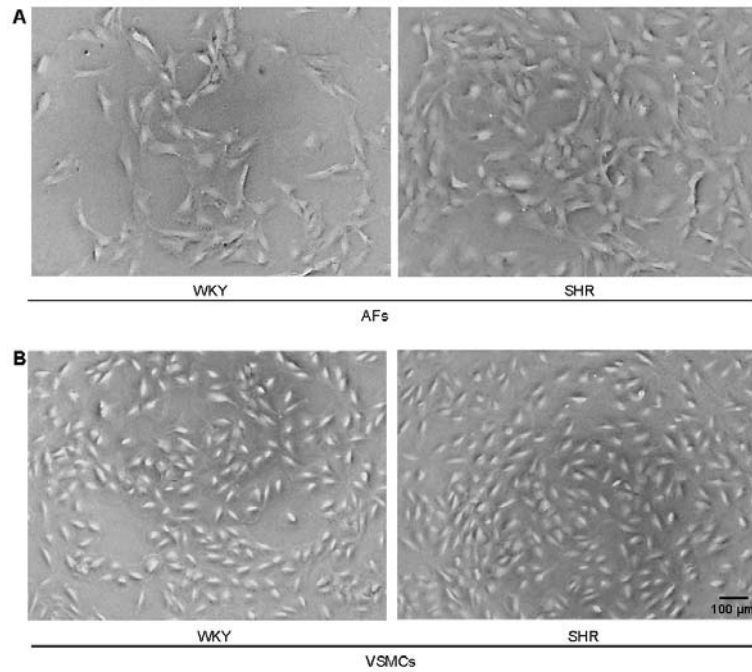

**Figure S1. AFs and VSMCs images under light microscopy. (A) AFs of WKY and SHR. (B) VSMCs of WKY and SHR.**

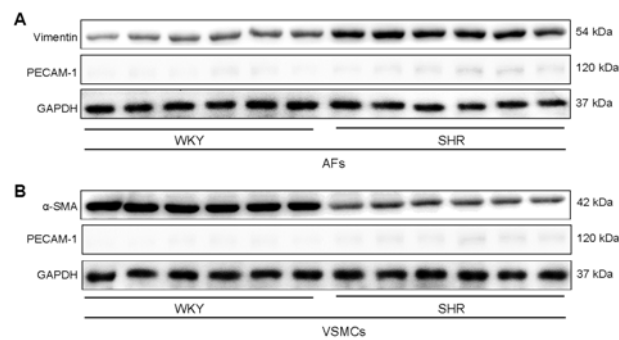

**Figure S2 Western blot showing Vimentin,  $\alpha$ -SMA and PECAM-1 protein expressions of AFs (A) and VSMCs (B).**

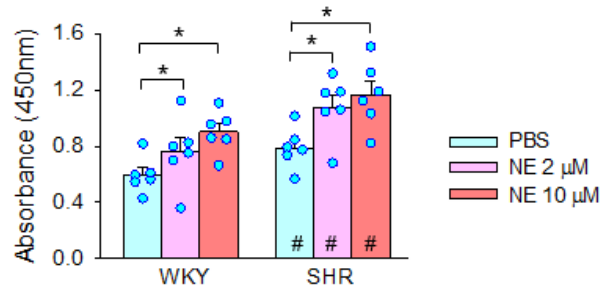

**Figure S3. Roles of norepinephrine (NE) in AFs proliferation.** The AFs were treated with PBS or NE (2  $\mu$ M or 10  $\mu$ M) for 24 h. AFs proliferation was evaluated by CCK-8. Data represent the mean  $\pm$  SEM from 6 independent experiments. \*P < 0.05; #P < 0.05 vs WKY. Two-way ANOVA followed by Bonferroni post hoc test.

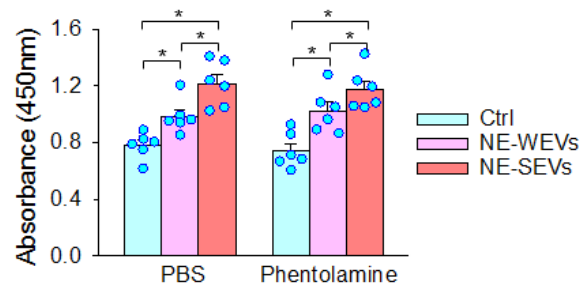

**Figure S4. Phentolamine treatment (3  $\mu$ M) in the VSMCs had no significant effects on the roles of NE-WEVs and NE-SEVs in promoting VSMCs proliferation of SHR.** Data represent the mean  $\pm$  SEM from 6 independent experiments. \*P < 0.05. Two-way ANOVA followed by Bonferroni post hoc test. NE-WEVs, EVs from NE-treated AFs of WKY; NE-SEVs, EVs from NE-treated AFs of SHR.

# Supplementary Table

**Table S1** Primers for qRT-PCR analysis in rats

| Name            | Primer | Sequence                           |
|-----------------|--------|------------------------------------|
| Rno-miR-135a-5p |        | 5'-GTGGTTTGTCCAAACTCATC-3'         |
| Rno-miR-155-5p  |        | 5'-CGTTAATGCTAATTGTGATAGGGGT-3'    |
| Rno-miR-U6      |        | 5'- TTGGAACGATACAGAGAAGATTAGCAT-3' |
